# Supplementary material for: Autologous T cell therapy for MAGE-A4+ solid cancers in HLA-A*02+ patients: a phase 1 trial
Source: Nat Med. 2023 Jan 9;29(1):104–14. doi: 10.1038/s41591-022-02128-z (PMC9873554; doi:10.1038/s41591-022-02128-z)
Supplement: Supplementary file 1 — List of investigators and study sites, Supplementary Fig. 1 and Supplementary Tables 1–15 [file 41591_2022_2128_MOESM1_ESM.pdf]

# Autologous T cell therapy for MAGE-A4<sup>+</sup> solid cancers in HLA-A\*02<sup>+</sup> patients: a phase 1 trial

---

In the format provided by the  
authors and unedited

## Table of Contents

|                                                                                                                                                                       |    |
|-----------------------------------------------------------------------------------------------------------------------------------------------------------------------|----|
| List of Investigators and Study Sites .....                                                                                                                           | 2  |
| Supplementary Figures.....                                                                                                                                            | 3  |
| Supplementary Figure 1. Example of flow cytometry gating strategy .....                                                                                               | 3  |
| Supplementary Tables .....                                                                                                                                            | 4  |
| Supplementary Table 1. Summary of HLA status and antigen MAGE-A4 expression at screening (modified intent-to-treat population; N=38) .....                            | 4  |
| Supplementary Table 2. Summary of patient characteristics (modified intent-to-treat population; N=38) .....                                                           | 5  |
| Supplementary Table 3. Summary of synovial sarcoma subgroup characteristics .....                                                                                     | 7  |
| Supplementary Table 4. Incidence of cytokine release syndrome (modified intent-to-treat population; N=38).....                                                        | 8  |
| Supplementary Table 5. Patients with SS administered two afami-cel infusions.....                                                                                     | 9  |
| Supplementary Table 6. Summary of overall response rate and best overall response (modified intent-to-treat population; N=38) .....                                   | 10 |
| Supplementary Table 7. Integration site analysis to evaluate clonality status .....                                                                                   | 11 |
| Supplementary Table 8. Serum proteins peak and AUC concentrations for patients with cytokine release syndrome versus patients without cytokine release syndrome ..... | 12 |
| Supplementary Table 9. Correlation of peak serum level with best percentage change in target lesion SLD .....                                                         | 13 |
| Supplementary Table 10. Afami-cel dose, vector copy number, tumor MAGE-A4 expression and serum IFN $\gamma$ profiles in ovarian cancer across all dose groups .....   | 14 |
| Supplementary Table 11. Laboratory values to define adequate organ function .....                                                                                     | 15 |
| Supplementary Table 12. Prohibited therapy/treatment prior to leukapheresis or lymphodepleting chemotherapy .....                                                     | 16 |
| Supplementary Table 13. List of institutional review boards and ethics committees.....                                                                                | 18 |
| Supplementary Table 14. Fludarabine and cyclophosphamide treatment schema: all dose groups .....                                                                      | 20 |
| Supplementary Table 15. Antibody dilutions.....                                                                                                                       | 21 |

**List of Investigators and Study Sites**

| <b>Investigator</b>      | <b>Location</b>                                                        | <b>Number of Patients Treated</b> |
|--------------------------|------------------------------------------------------------------------|-----------------------------------|
| David S Hong, MD         | The University of Texas MD Anderson Cancer Center, Houston, TX, USA    | 16                                |
| Marcus Butler, MD        | Princess Margaret Cancer Centre, Toronto, ON, Canada                   | 10                                |
| Brian Van Tine, MD       | Washington University School of Medicine, St. Louis, MO, USA           | 7                                 |
| Anthony Olszanski, MD    | Fox Chase Cancer Center, Philadelphia, PA, USA                         | 2                                 |
| David A Liebner, MD      | James Cancer Hospital and Solove Research Institute, Columbus, OH, USA | 1                                 |
| Melissa L Johnson, MD    | The Sarah Cannon Research Institute, Nashville, TN, USA                | 1                                 |
| Adekunle Odunsi, MD, PhD | Roswell Park Cancer Institute, Buffalo, NY, USA                        | 1                                 |
| Jeffrey Clarke, MD       | Duke University Medical Cancer Center, Durham, NC, USA                 | 0                                 |
| Mihaela Druta, MD        | H. Lee Moffitt Cancer and Research Institute, Tampa, FL, USA           | 0                                 |
| Brian M Slomovitz, MD    | Sylvester Comprehensive Cancer Center, Miami, FL, USA                  | 0                                 |

## Supplementary Figures

### Supplementary Figure 1. Example of flow cytometry gating strategy

Gating was applied according to the following hierarchy. Live cells excluding Aqua dead cell stain were gated. Within these a lymphocyte gate was applied as shown. Single lymphocytes were gated from here and CD3+ cells gated therein. From the CD3+ population CD4+ and CD8+ gates were applied and within these gated for TCR status via a Dextramer reagent. From these transduced and non-transduced CD4 and CD8 gates, CD45RA and CCR7 quadrants were applied to select memory subsets

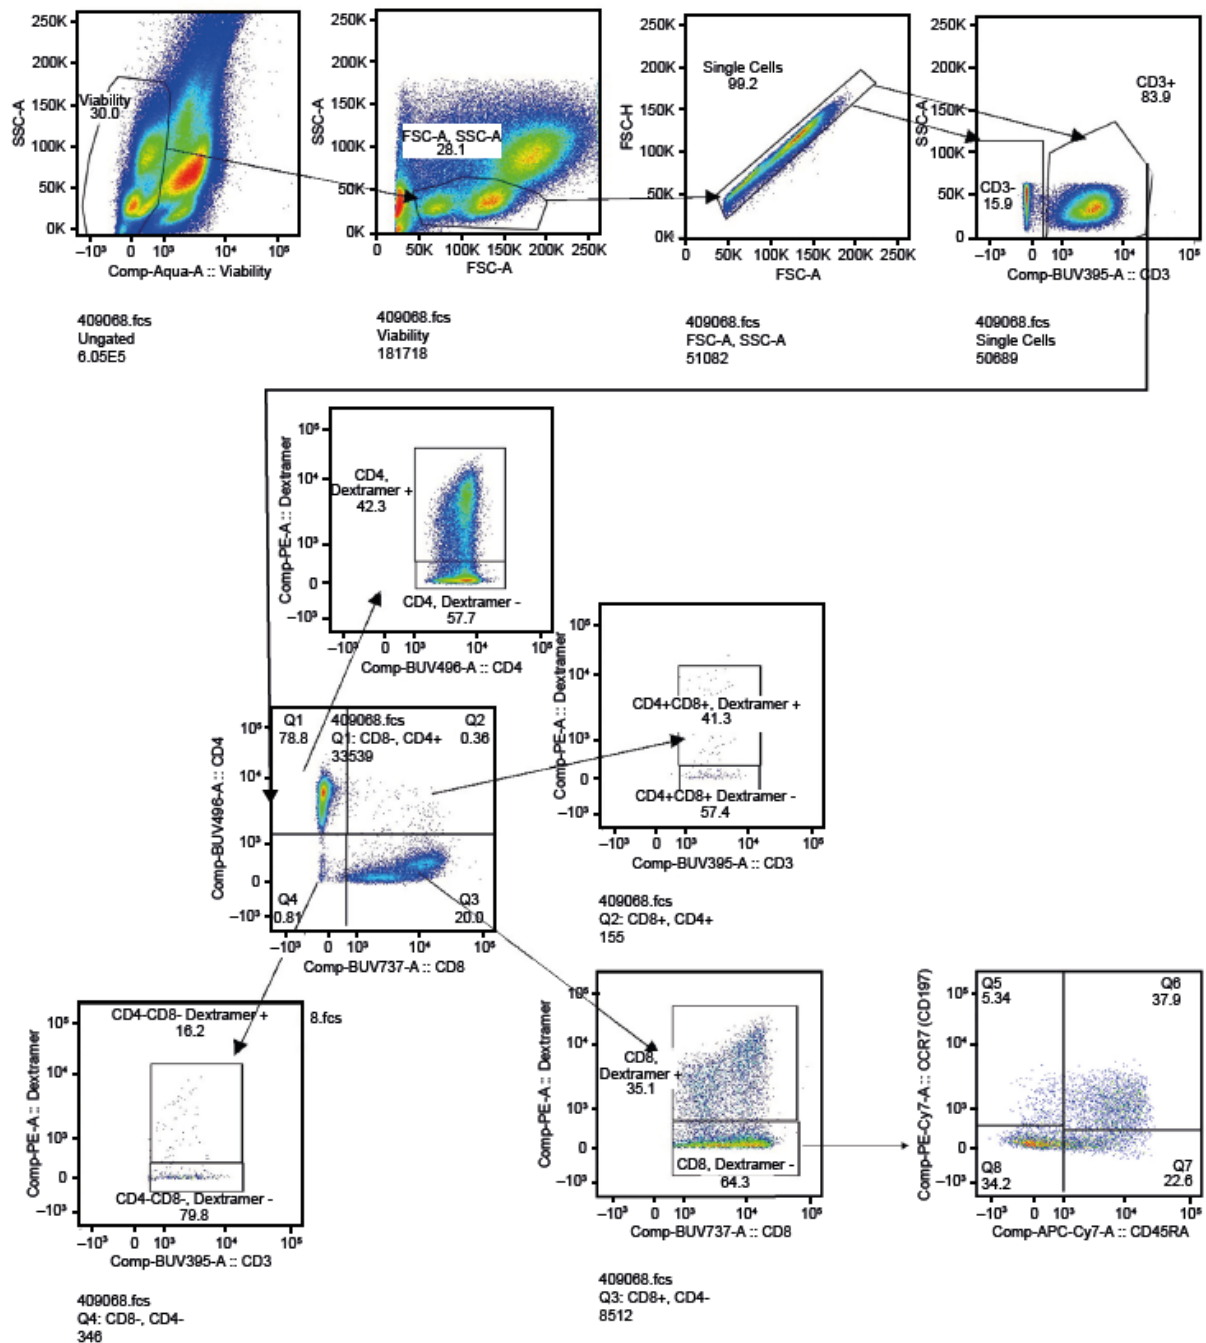

## Supplementary Tables

**Supplementary Table 1. Summary of HLA status and antigen MAGE-A4 expression at screening (modified intent-to-treat population; N=38)**

| Parameter                               | Category    | Statistic                 | Overall (N=38)         |
|-----------------------------------------|-------------|---------------------------|------------------------|
| HLA inclusion allele <sup>a</sup>       | HLA-A*02:01 | n (%)                     | 35 (92.1) <sup>a</sup> |
|                                         | HLA-A*02:03 | n (%)                     | 1 (2.6)                |
|                                         | HLA-A*02:06 | n (%)                     | 2 (5.3)                |
| MAGE-A4 expression H-score <sup>b</sup> | NA          | Mean (standard deviation) | 176.8 (98.25)          |
|                                         |             | Median                    | 189.0                  |
|                                         |             | Min, max                  | 15, 300                |

<sup>a</sup> 29 patients had A\*02:01 as allele 1 and 12 patients had A\*02:01 as allele 2 (the allele with the lower number is allele 1 by default). Of these, 6 patients had A\*02:01 as both allele 1 and allele 2 (homozygous) and were counted once

<sup>b</sup> H-score = (% stained cells at 0) × 0 + (% stained cells at 1+) × 1 + (% stained cells at 2+) × 2 + (% stained cells at 3+) × 3; The H score range is 0-300

HLA, human leukocyte antigen; MAGE-A4, melanoma-associated antigen A4; NA, not applicable

**Supplementary Table 2. Summary of patient characteristics (modified intent-to-treat population; N=38)**

| Parameter                                                       | Category                      | Statistic                 | Overall (N=38) |
|-----------------------------------------------------------------|-------------------------------|---------------------------|----------------|
| Age (years)                                                     |                               | N                         | 38             |
|                                                                 |                               | Mean (standard deviation) | 56.4 (12.59)   |
|                                                                 |                               | Median                    | 58.0           |
|                                                                 |                               | Min, max                  | 31, 78         |
| Age categorization                                              | <65 years                     | n (%)                     | 28 (73.7)      |
|                                                                 | ≥65 years                     | n (%)                     | 10 (26.3)      |
| Sex                                                             | Male                          | n (%)                     | 22 (57.9)      |
|                                                                 | Female                        | n (%)                     | 16 (42.1)      |
| Height (cm)                                                     |                               | N                         | 33             |
|                                                                 |                               | Mean (standard deviation) | 172.0 (10.55)  |
|                                                                 |                               | Median                    | 173.0          |
|                                                                 |                               | Min, max                  | 147.0, 190.0   |
| Weight (kg)                                                     |                               | N                         | 38             |
|                                                                 |                               | Mean (standard deviation) | 83.9 (22.55)   |
|                                                                 |                               | Median                    | 81.7           |
|                                                                 |                               | Min, max                  | 42.9, 148.8    |
| BMI (kg/m <sup>2</sup> )                                        |                               | N                         | 33             |
|                                                                 |                               | Mean (standard deviation) | 27.4 (6.84)    |
|                                                                 |                               | Median                    | 26.0           |
|                                                                 |                               | Min, max                  | 15.5, 46.6     |
| Ethnicity                                                       | Hispanic/Latino               | n (%)                     | 2 (5.3)        |
|                                                                 | Not Hispanic/Latino           | n (%)                     | 36 (94.7)      |
| Race                                                            | White                         | n (%)                     | 35 (92.1)      |
|                                                                 | Asian                         | n (%)                     | 3 (7.9)        |
| Geographical region                                             | North America                 | n (%)                     | 38 (100)       |
| Primary tumor type                                              | Esophageal                    | n (%)                     | 2 (5.3)        |
|                                                                 | Gastric                       | n (%)                     | 1 (2.6)        |
|                                                                 | Head and neck                 | n (%)                     | 3 (7.9)        |
|                                                                 | Melanoma                      | n (%)                     | 1 (2.6)        |
|                                                                 | Non-small-cell lung cancer    | n (%)                     | 2 (5.3)        |
|                                                                 | Ovarian                       | n (%)                     | 9 (23.7)       |
|                                                                 | Urothelial                    | n (%)                     | 2 (5.3)        |
|                                                                 | Myxoid/Round cell liposarcoma | n (%)                     | 2 (5.3)        |
|                                                                 | Synovial sarcoma              | n (%)                     | 16 (42.1)      |
| ECOG score                                                      | 0                             | n (%)                     | 13 (34.2)      |
|                                                                 | 1                             | n (%)                     | 25 (65.8)      |
| Time from initial diagnosis to enrollment (months) <sup>a</sup> |                               | Mean (standard deviation) | 48.5 (40.23)   |
|                                                                 |                               | Median                    | 37.5           |
|                                                                 |                               | Min, max                  | 5.2, 203.2     |
|                                                                 |                               | Mean (standard deviation) | 51.4 (40.33)   |

| Parameter                                                            | Category                        | Statistic                 | Overall (N=38)    |
|----------------------------------------------------------------------|---------------------------------|---------------------------|-------------------|
| Time from initial diagnosis to T-cell infusion (months) <sup>b</sup> |                                 | Median                    | 40.4              |
|                                                                      |                                 | Min, max                  | 7.3, 205.5        |
| Prior lines of systemic therapy                                      |                                 | Mean (standard deviation) | 3.2 (1.88)        |
|                                                                      |                                 | Median                    | 3.0               |
|                                                                      |                                 | Min, max                  | 1, 8              |
| Prior lines of systemic therapy (categorical)                        | 1                               | n (%)                     | 7 (18.4)          |
|                                                                      | 2                               | n (%)                     | 10 (26.3)         |
|                                                                      | 3                               | n (%)                     | 6 (15.8)          |
|                                                                      | ≥4                              | n (%)                     | 15 (39.5)         |
| Prior anti-cancer therapy                                            | Cytotoxic chemotherapy          | n (%)                     | 37 (97.4)         |
|                                                                      | Immunotherapy                   | n (%)                     | 12 (31.6)         |
|                                                                      | Biological therapy              | n (%)                     | 1 (2.6)           |
|                                                                      | Small molecule/targeted therapy | n (%)                     | 5 (13.2)          |
|                                                                      | Radiotherapy                    | n (%)                     | 22 (57.9)         |
|                                                                      | Any surgery                     | n (%)                     | 32 (84.2)         |
|                                                                      | Other therapy                   | n (%)                     | 2 (5.3)           |
| Bridging therapy                                                     | Cytotoxic chemotherapy          | n (%)                     | 21 (55.3)         |
|                                                                      | Immunotherapy                   | n (%)                     | 2 (5.3)           |
|                                                                      | Small molecule/targeted therapy | n (%)                     | 3 (7.9)           |
|                                                                      | Radiotherapy                    | n (%)                     | 2 (5.3)           |
|                                                                      | Any surgery                     | n (%)                     | 2 (5.3)           |
|                                                                      | Other therapy                   | n (%)                     | 2 (5.3)           |
| H-score <sup>c</sup>                                                 | NA                              | Mean (standard deviation) | 176.8 (98.25)     |
|                                                                      |                                 | Median                    | 189.0             |
|                                                                      |                                 | Min, max                  | 15, 300           |
| Total transduced cells (×10 <sup>9</sup> )                           |                                 | Mean (standard deviation) | 6.1213 (3.422688) |
|                                                                      |                                 | Median                    | 6.4022            |
|                                                                      |                                 | Min, max                  | 0.1, 9.9756       |

Note: Present height, weight, calculated BMI at baseline (not at screening)

<sup>a</sup> Time since initial Diagnosis in months is calculated as: (Date of signed ICF – date since initial diagnosis + 1)\*(12/365.25)

<sup>b</sup> Time from initial diagnosis to T-cell infusion in months is calculated as: (T-cell infusion date – date since initial diagnosis + 1)\*(12/365.25)

<sup>c</sup> H-score = (% stained cells at 0) × 0 + (% stained cells at 1+) × 1 + (% stained cells at 2+) × 2 + (% stained cells at 3+) × 3; The H score range is 0-300

BMI, body mass index; ECOG, Eastern Cooperative Oncology Group; ICF, informed consent form; NA, not applicable

**Supplementary Table 3. Summary of synovial sarcoma subgroup characteristics**

| Parameter                                                                                                                                                                                                                                       | Category | Statistic      | Synovial Sarcoma (N=16) |
|-------------------------------------------------------------------------------------------------------------------------------------------------------------------------------------------------------------------------------------------------|----------|----------------|-------------------------|
| Age (years)                                                                                                                                                                                                                                     |          | Median (range) | 49.0 (31, 76)           |
| Sex                                                                                                                                                                                                                                             | Male     | n (%)          | 10 (62.5)               |
|                                                                                                                                                                                                                                                 | Female   | n (%)          | 6 (37.5)                |
| Race                                                                                                                                                                                                                                            | White    | n (%)          | 14 (87.5)               |
|                                                                                                                                                                                                                                                 | Asian    | n (%)          | 2 (12.5)                |
| ECOG performance status                                                                                                                                                                                                                         | 0        | n (%)          | 10 (62.5)               |
|                                                                                                                                                                                                                                                 | 1        | n (%)          | 6 (37.5)                |
| Prior lines of systemic therapy                                                                                                                                                                                                                 |          | Median (range) | 2.5 (1, 6)              |
| H-score <sup>a</sup>                                                                                                                                                                                                                            |          | Median (range) | 249 (60, 300)           |
| Total transduced cells ( $\times 10^9$ )                                                                                                                                                                                                        |          | Median (range) | 9.28 (3.4, 10)          |
| <sup>a</sup> H-score = (% stained cells at 0) $\times$ 0 + (% stained cells at 1+) $\times$ 1 + (% stained cells at 2+) $\times$ 2 + (% stained cells at 3+) $\times$ 3; The H score range is 0-300<br>ECOG, Eastern Cooperative Oncology Group |          |                |                         |

**Supplementary Table 4. Incidence of cytokine release syndrome (modified intent-to-treat population; N=38)**

| Maximum grade  | Onset day | Duration, days | Serious Adverse Event | Relationship to Treatment           | Anti-IL-6/IL-6 Receptor    |
|----------------|-----------|----------------|-----------------------|-------------------------------------|----------------------------|
| 1              | 7         | 4              | Yes                   | T-cell infusion                     | Tocilizumab                |
| 1 <sup>a</sup> | 4         | 2              | No                    | T-cell infusion                     | No                         |
| 2              | 6         | 7              | No                    | T-cell infusion                     | Tocilizumab                |
| 2              | 9         | 7              | Yes                   | T-cell infusion                     | No                         |
| 2 <sup>b</sup> | 2         | 2              | No                    | T-cell infusion                     | Tocilizumab                |
| 2              | 25        | 4              | Yes                   | T-cell infusion                     | Tocilizumab                |
| 1              | 3         | 2              | No                    | T-cell infusion                     | No                         |
| 1              | 3         | 3              | No                    | T-cell infusion and LD chemotherapy | No                         |
| 1              | 2         | 5              | No                    | T-cell infusion                     | Tocilizumab                |
| 2              | 9         | 6              | Yes                   | T-cell infusion                     | No                         |
| 1              | 3         | 1              | No                    | T-cell infusion                     | No                         |
| 1 <sup>a</sup> | 2         | 2              | No                    | T-cell infusion                     | No                         |
| 2              | 4         | 4              | Yes                   | T-cell infusion                     | No                         |
| 1              | 3         | 3              | No                    | T-cell infusion                     | No                         |
| 1 <sup>a</sup> | 1         | 1              | No                    | T-cell infusion                     | No                         |
| 1              | 3         | 11             | No                    | T-cell infusion                     | No                         |
| 1 <sup>a</sup> | 2         | 12             | Yes                   | T-cell infusion                     | No                         |
| 3              | 14        | 1              | Yes                   | T-cell infusion                     | Tocilizumab                |
| 1              | 15        | 6              | Yes                   | T-cell infusion                     | No                         |
| 1              | 6         | 9              | Yes                   | T-cell infusion and LD chemotherapy | Tocilizumab                |
| 3 <sup>a</sup> | 2         | 12             | Yes                   | T-cell infusion                     | Tocilizumab and siltuximab |
| 4              | 39        | 14             | Yes                   | T-cell infusion                     |                            |
| 2              | 2         | 2              | No                    | T-cell infusion                     | Tocilizumab                |
| 1 <sup>a</sup> | 3         | 1              | No                    | T-cell infusion                     | No                         |
| 2              | 4         | 3              | No                    | T-cell infusion                     | No                         |
| 1              | 4         | 2              | No                    | T-cell infusion                     | Tocilizumab                |
| 2              | 2         | 7              | Yes                   | T-cell infusion                     | Tocilizumab                |
| 1              | 2         | 2              | No                    | T-cell infusion                     | Tocilizumab                |
| 1 <sup>a</sup> | 2         | 2              | No                    | T-cell infusion                     | No                         |
| 2              | 4         | 2              | No                    | T-cell infusion                     | Tocilizumab                |

<sup>a</sup> >1 separate CRS event reported in a single patient  
<sup>b</sup> Patient treated with two separate afami-cel infusions  
CRS, cytokine release syndrome; IL, interleukin; LD, lymphodepletion

**Supplementary Table 5. Patients with SS administered two afami-cel infusions**

|                                                                                                                                                                                                                                                                                                                                                                                                                                                                                                                                                                                                                                                                                                                                                                                                                                                                                                                                                                                               |                            | <b>1st Afami-cel Infusion</b>                                                            | <b>2nd Afami-cel Infusion*</b> |
|-----------------------------------------------------------------------------------------------------------------------------------------------------------------------------------------------------------------------------------------------------------------------------------------------------------------------------------------------------------------------------------------------------------------------------------------------------------------------------------------------------------------------------------------------------------------------------------------------------------------------------------------------------------------------------------------------------------------------------------------------------------------------------------------------------------------------------------------------------------------------------------------------------------------------------------------------------------------------------------------------|----------------------------|------------------------------------------------------------------------------------------|--------------------------------|
| Patient A                                                                                                                                                                                                                                                                                                                                                                                                                                                                                                                                                                                                                                                                                                                                                                                                                                                                                                                                                                                     | Date of Afami-cel Infusion | 14 January 2019                                                                          | 12 August 2019                 |
|                                                                                                                                                                                                                                                                                                                                                                                                                                                                                                                                                                                                                                                                                                                                                                                                                                                                                                                                                                                               | MAGE-A4 H-Score            | 214 (screening)                                                                          | 37 (baseline)**                |
|                                                                                                                                                                                                                                                                                                                                                                                                                                                                                                                                                                                                                                                                                                                                                                                                                                                                                                                                                                                               | Transduced Cell Dose       | 9.9×10 <sup>9</sup>                                                                      | 5.4×10 <sup>9</sup>            |
|                                                                                                                                                                                                                                                                                                                                                                                                                                                                                                                                                                                                                                                                                                                                                                                                                                                                                                                                                                                               | Target Lesion Baseline SLD | 20.4 cm<br>(large left lung pleural lesion crossing midline; see Figure 3 (upper panel)) | 21.4 cm                        |
|                                                                                                                                                                                                                                                                                                                                                                                                                                                                                                                                                                                                                                                                                                                                                                                                                                                                                                                                                                                               | CRS                        | Grade 2                                                                                  | Grade 2                        |
|                                                                                                                                                                                                                                                                                                                                                                                                                                                                                                                                                                                                                                                                                                                                                                                                                                                                                                                                                                                               | ICANS                      | No                                                                                       | No                             |
|                                                                                                                                                                                                                                                                                                                                                                                                                                                                                                                                                                                                                                                                                                                                                                                                                                                                                                                                                                                               | Prolonged Cytopenia at WK4 | Hb and neutrophils                                                                       | Hb and platelets               |
|                                                                                                                                                                                                                                                                                                                                                                                                                                                                                                                                                                                                                                                                                                                                                                                                                                                                                                                                                                                               | SAEs                       | CRS Grade 2                                                                              | Pulmonary embolism: Grade 3    |
|                                                                                                                                                                                                                                                                                                                                                                                                                                                                                                                                                                                                                                                                                                                                                                                                                                                                                                                                                                                               | BOR                        | PR (-45% SLD reduction)                                                                  | PD                             |
|                                                                                                                                                                                                                                                                                                                                                                                                                                                                                                                                                                                                                                                                                                                                                                                                                                                                                                                                                                                               | DoR                        | 14.14 W                                                                                  | Not applicable                 |
| Patient B                                                                                                                                                                                                                                                                                                                                                                                                                                                                                                                                                                                                                                                                                                                                                                                                                                                                                                                                                                                     | Date of Afami-cel Infusion | 28 January 2019                                                                          | 14 October 2019                |
|                                                                                                                                                                                                                                                                                                                                                                                                                                                                                                                                                                                                                                                                                                                                                                                                                                                                                                                                                                                               | MAGE-A4 H-Score            | 286 (screening)                                                                          | 300 (baseline)                 |
|                                                                                                                                                                                                                                                                                                                                                                                                                                                                                                                                                                                                                                                                                                                                                                                                                                                                                                                                                                                               | Transduced Cell Dose       | 9.9×10 <sup>9</sup>                                                                      | 8.0×10 <sup>9</sup>            |
|                                                                                                                                                                                                                                                                                                                                                                                                                                                                                                                                                                                                                                                                                                                                                                                                                                                                                                                                                                                               | Target Lesion Baseline SLD | 24.0 cm                                                                                  | 10.8 cm                        |
|                                                                                                                                                                                                                                                                                                                                                                                                                                                                                                                                                                                                                                                                                                                                                                                                                                                                                                                                                                                               | CRS                        | Grade 2                                                                                  | No                             |
|                                                                                                                                                                                                                                                                                                                                                                                                                                                                                                                                                                                                                                                                                                                                                                                                                                                                                                                                                                                               | ICANS                      | No                                                                                       | No                             |
|                                                                                                                                                                                                                                                                                                                                                                                                                                                                                                                                                                                                                                                                                                                                                                                                                                                                                                                                                                                               | Prolonged Cytopenia at WK4 | No                                                                                       | No                             |
|                                                                                                                                                                                                                                                                                                                                                                                                                                                                                                                                                                                                                                                                                                                                                                                                                                                                                                                                                                                               | SAEs                       | Laryngeal hemorrhage: Grade 3                                                            | None                           |
|                                                                                                                                                                                                                                                                                                                                                                                                                                                                                                                                                                                                                                                                                                                                                                                                                                                                                                                                                                                               | BOR                        | PR (-86% SLD reduction)                                                                  | SD                             |
|                                                                                                                                                                                                                                                                                                                                                                                                                                                                                                                                                                                                                                                                                                                                                                                                                                                                                                                                                                                               | DoR                        | 12.28 W                                                                                  | Not applicable                 |
| <p>*2nd afami-cel infusion was administered after confirmation of progressive disease from a 1st infusion that attained a PR; in both cases, 2nd T-cell infusions were manufactured from surplus cells collected at the initial leukapheresis and patients were administered Flu/Cy LD chemotherapy before 2nd T-cell infusion</p> <p>**Decrease in MAGE-A4 expression at tumor progression is being evaluated as a mechanism of immune escape in the ongoing phase 2, SPEARHEAD-1, trial in SS and MRCLS</p> <p>BOR, best overall response; CRS, cytokine release syndrome; Cy, cyclophosphamide; DoR duration of response; flu, Fludarabine; Hb, hemoglobin; ICANS, immune effector cell-associated neurotoxicity syndrome; MAGE-A4, melanoma-associated antigen A4; MRCLS, myxoid/round cell liposarcoma; PD, progressive disease; PR, partial response; PT, patient; SAE, serious adverse event; SD, stable disease; SLD, sum of the longest diameter; SS, synovial sarcoma; WK, week</p> |                            |                                                                                          |                                |

**Supplementary Table 6. Summary of overall response rate and best overall response (modified intent-to-treat population; N=38)**

| Parameter/Category                                                                                                                                                                                                                                                                                                                                                                                                                                                                                                                                                                                                                                                                                                                                                                                                                                                                                                                                                                                                                                                                                                                                                                                                                                                                                                                                                                                                                                                                                                                                                                                                                                                                                                                                                                                                                                                                                                                                                                                                                                                                                                                                                                                                                                                                                                                                                                                                                                                                                                                                           | All Tumors                    |                   |
|--------------------------------------------------------------------------------------------------------------------------------------------------------------------------------------------------------------------------------------------------------------------------------------------------------------------------------------------------------------------------------------------------------------------------------------------------------------------------------------------------------------------------------------------------------------------------------------------------------------------------------------------------------------------------------------------------------------------------------------------------------------------------------------------------------------------------------------------------------------------------------------------------------------------------------------------------------------------------------------------------------------------------------------------------------------------------------------------------------------------------------------------------------------------------------------------------------------------------------------------------------------------------------------------------------------------------------------------------------------------------------------------------------------------------------------------------------------------------------------------------------------------------------------------------------------------------------------------------------------------------------------------------------------------------------------------------------------------------------------------------------------------------------------------------------------------------------------------------------------------------------------------------------------------------------------------------------------------------------------------------------------------------------------------------------------------------------------------------------------------------------------------------------------------------------------------------------------------------------------------------------------------------------------------------------------------------------------------------------------------------------------------------------------------------------------------------------------------------------------------------------------------------------------------------------------|-------------------------------|-------------------|
|                                                                                                                                                                                                                                                                                                                                                                                                                                                                                                                                                                                                                                                                                                                                                                                                                                                                                                                                                                                                                                                                                                                                                                                                                                                                                                                                                                                                                                                                                                                                                                                                                                                                                                                                                                                                                                                                                                                                                                                                                                                                                                                                                                                                                                                                                                                                                                                                                                                                                                                                                              | Group 3 + Expansion<br>(N=32) | Overall<br>(N=38) |
| Best Overall Response, n (%)                                                                                                                                                                                                                                                                                                                                                                                                                                                                                                                                                                                                                                                                                                                                                                                                                                                                                                                                                                                                                                                                                                                                                                                                                                                                                                                                                                                                                                                                                                                                                                                                                                                                                                                                                                                                                                                                                                                                                                                                                                                                                                                                                                                                                                                                                                                                                                                                                                                                                                                                 |                               |                   |
| Complete Response                                                                                                                                                                                                                                                                                                                                                                                                                                                                                                                                                                                                                                                                                                                                                                                                                                                                                                                                                                                                                                                                                                                                                                                                                                                                                                                                                                                                                                                                                                                                                                                                                                                                                                                                                                                                                                                                                                                                                                                                                                                                                                                                                                                                                                                                                                                                                                                                                                                                                                                                            | 0                             | 0                 |
| PR                                                                                                                                                                                                                                                                                                                                                                                                                                                                                                                                                                                                                                                                                                                                                                                                                                                                                                                                                                                                                                                                                                                                                                                                                                                                                                                                                                                                                                                                                                                                                                                                                                                                                                                                                                                                                                                                                                                                                                                                                                                                                                                                                                                                                                                                                                                                                                                                                                                                                                                                                           | 9 (28.1)                      | 9 (23.7)          |
| SD                                                                                                                                                                                                                                                                                                                                                                                                                                                                                                                                                                                                                                                                                                                                                                                                                                                                                                                                                                                                                                                                                                                                                                                                                                                                                                                                                                                                                                                                                                                                                                                                                                                                                                                                                                                                                                                                                                                                                                                                                                                                                                                                                                                                                                                                                                                                                                                                                                                                                                                                                           | 14 (43.8)                     | 19 (50.0)         |
| PD                                                                                                                                                                                                                                                                                                                                                                                                                                                                                                                                                                                                                                                                                                                                                                                                                                                                                                                                                                                                                                                                                                                                                                                                                                                                                                                                                                                                                                                                                                                                                                                                                                                                                                                                                                                                                                                                                                                                                                                                                                                                                                                                                                                                                                                                                                                                                                                                                                                                                                                                                           | 6 (18.8)                      | 7 (18.4)          |
| Not Evaluable                                                                                                                                                                                                                                                                                                                                                                                                                                                                                                                                                                                                                                                                                                                                                                                                                                                                                                                                                                                                                                                                                                                                                                                                                                                                                                                                                                                                                                                                                                                                                                                                                                                                                                                                                                                                                                                                                                                                                                                                                                                                                                                                                                                                                                                                                                                                                                                                                                                                                                                                                | 3 (9.4)                       | 3 (7.9)           |
| Overall Response Rate                                                                                                                                                                                                                                                                                                                                                                                                                                                                                                                                                                                                                                                                                                                                                                                                                                                                                                                                                                                                                                                                                                                                                                                                                                                                                                                                                                                                                                                                                                                                                                                                                                                                                                                                                                                                                                                                                                                                                                                                                                                                                                                                                                                                                                                                                                                                                                                                                                                                                                                                        |                               |                   |
| Complete Response + PR, n (%)                                                                                                                                                                                                                                                                                                                                                                                                                                                                                                                                                                                                                                                                                                                                                                                                                                                                                                                                                                                                                                                                                                                                                                                                                                                                                                                                                                                                                                                                                                                                                                                                                                                                                                                                                                                                                                                                                                                                                                                                                                                                                                                                                                                                                                                                                                                                                                                                                                                                                                                                | 9 (28.1)                      | 9 (23.7)          |
| 95% confidence interval                                                                                                                                                                                                                                                                                                                                                                                                                                                                                                                                                                                                                                                                                                                                                                                                                                                                                                                                                                                                                                                                                                                                                                                                                                                                                                                                                                                                                                                                                                                                                                                                                                                                                                                                                                                                                                                                                                                                                                                                                                                                                                                                                                                                                                                                                                                                                                                                                                                                                                                                      | (13.7, 46.7)                  | (11.4, 40.2)      |
| Disease Control Rate                                                                                                                                                                                                                                                                                                                                                                                                                                                                                                                                                                                                                                                                                                                                                                                                                                                                                                                                                                                                                                                                                                                                                                                                                                                                                                                                                                                                                                                                                                                                                                                                                                                                                                                                                                                                                                                                                                                                                                                                                                                                                                                                                                                                                                                                                                                                                                                                                                                                                                                                         |                               |                   |
| Complete Response + PR + SD, n (%)                                                                                                                                                                                                                                                                                                                                                                                                                                                                                                                                                                                                                                                                                                                                                                                                                                                                                                                                                                                                                                                                                                                                                                                                                                                                                                                                                                                                                                                                                                                                                                                                                                                                                                                                                                                                                                                                                                                                                                                                                                                                                                                                                                                                                                                                                                                                                                                                                                                                                                                           | 23 (71.9)                     | 28 (73.7)         |
| <p>Evaluated using RECIST v1.1. LD, lymphodepletion; NSCLC, non-small cell lung cancer; PD, progressive disease; PR, partial response; RECIST, Response Evaluation Criteria in Solid Tumors; SD, stable disease; SS, synovial sarcoma. The 9 patients with PR were all in the expansion group that was composed of 7 patients with SS and 1 patient each with head and neck cancer and NSCLC. Two of the patients with SS received the higher dose of LD chemotherapy. Of the 19 patients with SD, 12 were in the expansion group that was composed of 7 patients with SS (2 of the SS patients received high dose LD chemotherapy), 2 patients with myxoid/round cell liposarcoma, and 1 patient each head and neck, ovarian, and urothelial cancer. Two of the patients with SD were in Group 1 and 3 patients were in Group 2; all had ovarian cancer. Two of the patients with SD were in Group 3: 1 patient with SS and 1 patient with ovarian cancer. Of the 7 patients with PD, 6 were in the expansion group and 1 was an ovarian cancer patient in Group 1. The patients with PD in the expansion group included 2 patients with squamous cell carcinoma (1 squamous cell carcinoma patient received high dose LD chemotherapy) and 1 patient each with SS, gastric cancer, urothelial cancer, and melanoma. LD Chemotherapy Dose and Median Transduced Cell Dose per Group: Group 1: LD chemotherapy dose-cyclophosphamide (600 mg/m<sup>2</sup>/day) on Days -7, -6, and -5; fludarabine (30 mg/m<sup>2</sup>/day) on Days -7, -6, and -5; median transduced cell dose of 0.1×10<sup>9</sup> cells. Group 2: LD chemotherapy dose-cyclophosphamide (600 mg/m<sup>2</sup>/day) on Days -7, -6, and -5; fludarabine (30 mg/m<sup>2</sup>/day) on Days -7, -6, and -5; median transduced cell dose of 1.2×10<sup>9</sup> cells. Group 3: LD chemotherapy dose-cyclophosphamide (600 mg/m<sup>2</sup>/day) on Days -7, -6, and -5; fludarabine (30 mg/m<sup>2</sup>/day) on Days -7, -6, -5, and -4; median transduced cell dose of 5.67×10<sup>9</sup> cells. Expansion: LD chemotherapy dose-cyclophosphamide (600 mg/m<sup>2</sup>/day) on Days -7, -6, and -5; fludarabine (30 mg/m<sup>2</sup>/day) on Days -7, -6, -5, and -4; median transduced cell dose of 7.85×10<sup>9</sup> cells. Expansion: Higher dose LD chemotherapy-cyclophosphamide (1800 mg/m<sup>2</sup>/day) for Days -3 and -2 in combination with fludarabine (30 mg/m<sup>2</sup>/day) Days -5, -4, -3, and -2; median transduced cell dose of 7.85×10<sup>9</sup> cells</p> |                               |                   |

**Supplementary Table 7. Integration site analysis to evaluate clonality status**

| <b>Patient</b>                                                                                                                                                                                                                                                                                                                                                                                                                                                                                    | <b>Sample</b> | <b>Unique Sites</b> | <b>Pielou Diversity Index</b> | <b>Persistence (Vector Copies/<math>\mu</math>g DNA)</b> |
|---------------------------------------------------------------------------------------------------------------------------------------------------------------------------------------------------------------------------------------------------------------------------------------------------------------------------------------------------------------------------------------------------------------------------------------------------------------------------------------------------|---------------|---------------------|-------------------------------|----------------------------------------------------------|
| 1                                                                                                                                                                                                                                                                                                                                                                                                                                                                                                 | T-cells       | 19,546              | 1.000                         |                                                          |
|                                                                                                                                                                                                                                                                                                                                                                                                                                                                                                   | Month 6 PBMC  | 2,190               | 1.000                         | 27,962                                                   |
|                                                                                                                                                                                                                                                                                                                                                                                                                                                                                                   | Month 12 PBMC | 252                 | 0.989                         | 4,675                                                    |
| 2                                                                                                                                                                                                                                                                                                                                                                                                                                                                                                 | T-cells       | 6,558               | 1.000                         |                                                          |
|                                                                                                                                                                                                                                                                                                                                                                                                                                                                                                   | Month 9 PBMC  | 976                 | 1.000                         | 30,501                                                   |
|                                                                                                                                                                                                                                                                                                                                                                                                                                                                                                   | Month 12 PBMC | 850                 | 0.995                         | 24,550                                                   |
| 3                                                                                                                                                                                                                                                                                                                                                                                                                                                                                                 | T-cells       | 1,559               | 1.000                         |                                                          |
|                                                                                                                                                                                                                                                                                                                                                                                                                                                                                                   | Month 9 PBMC  | 1,307               | 1.000                         | 34,445                                                   |
|                                                                                                                                                                                                                                                                                                                                                                                                                                                                                                   | Month 12 PBMC | 551                 | 0.997                         | 57,181                                                   |
| 4                                                                                                                                                                                                                                                                                                                                                                                                                                                                                                 | T-cells       | 2,369               | 1.000                         |                                                          |
|                                                                                                                                                                                                                                                                                                                                                                                                                                                                                                   | Month 12 PBMC | 125                 | 0.998                         | 12,895                                                   |
|                                                                                                                                                                                                                                                                                                                                                                                                                                                                                                   | Month 15 PBMC | 1,015               | 0.993                         | 11,011                                                   |
| 5                                                                                                                                                                                                                                                                                                                                                                                                                                                                                                 | T-cells       | 5,574               | 1.000                         |                                                          |
|                                                                                                                                                                                                                                                                                                                                                                                                                                                                                                   | Month 6 PBMC  | 1,182               | 0.999                         | 81,859                                                   |
|                                                                                                                                                                                                                                                                                                                                                                                                                                                                                                   | Month 12 PBMC | 381                 | 0.999                         | 12,876                                                   |
| Integration site analysis was used to evaluate clonality status. The Pielou evenness index (between 0 and 1, 1 meaning that the distribution of the cells is completely even across all integration sites, i.e., no clonal dominance, and the vector copy number in the corresponding PBMC sample demonstrate a high level of polyclonality and absence of clonal dominance in all post-infusion samples in patients with elevated long-term persistence. PBMC, peripheral blood mononuclear cell |               |                     |                               |                                                          |

**Supplementary Table 8. Serum proteins peak and AUC concentrations for patients with cytokine release syndrome versus patients without cytokine release syndrome**

| Serum protein  | Metric <sup>a</sup> | Median pg/mL |          | Univariate <i>P</i> value <sup>b</sup> |     | Multiple comparisons <i>P</i> adjusted <sup>c</sup> |    |
|----------------|---------------------|--------------|----------|----------------------------------------|-----|-----------------------------------------------------|----|
|                |                     | CRS          | Non-CRS  |                                        |     |                                                     |    |
| GMCSF          | Peak                | 7.88         | 1.725    | 0.000971                               | *** | 0.015529                                            | *  |
|                | AUC                 | 39.88        | 12.156   | 0.000221                               | *** | 0.004191                                            | ** |
| IFN $\gamma$   | Peak                | 270.83       | 47.68    | 0.00012                                | *** | 0.002402                                            | ** |
|                | AUC                 | 1455.046     | 467.0139 | 0.00061                                | *** | 0.010976                                            | ** |
| IL-10          | Peak                | 9.785        | 2.915    | 0.020994                               | *   | 0.230935                                            | ns |
|                | AUC                 | 96.38442     | 28.0825  | 0.023466                               | *   | 0.234658                                            | ns |
| IL-2           | Peak                | 2.83         | 2.04     | 0.052278                               | ns  | 0.431994                                            | ns |
|                | AUC                 | 28.96357     | 15.46125 | 0.001245                               | **  | 0.018675                                            | *  |
| IL-2R $\alpha$ | Peak                | 7758.99      | 5300.86  | 0.057269                               | ns  | 0.431994                                            | ns |
|                | AUC                 | 99860.57     | 62037.02 | 0.058604                               | ns  | 0.431994                                            | ns |
| IL-5           | Peak                | 39.88        | 6.59     | 0.018256                               | *   | 0.21907                                             | ns |
|                | AUC                 | 229.0675     | 36.0775  | 0.004776                               | **  | 0.062088                                            | ns |
| IL-6           | Peak                | 156.56       | 19.59    | 0.001374                               | **  | 0.01924                                             | *  |
|                | AUC                 | 1168.038     | 132.966  | 0.000777                               | *** | 0.013202                                            | *  |
| IL-8           | Peak                | 69.08        | 119.33   | 0.518362                               | ns  | 1                                                   | ns |
|                | AUC                 | 870.515      | 689.9    | 0.631126                               | ns  | 1                                                   | ns |
| IL-15          | Peak                | 49.26        | 43.57    | 0.304173                               | ns  | 0.91252                                             | ns |
|                | AUC                 | 569.15       | 375.3841 | 0.071126                               | ns  | 0.431994                                            | ns |
| TNF $\alpha$   | Peak                | 7.76         | 5.415    | 0.047999                               | *   | 0.431994                                            | ns |
|                | AUC                 | 98.18857     | 78.77875 | 0.088132                               | ns  | 0.431994                                            | ns |

<sup>a</sup> 'Peak' represents the maximum pg/mL measured across post-infusion sampling time points collected across first 21 days post-infusion; 'AUC' calculated 0 to 21 days post-infusion

<sup>b</sup> Two-sided Wilcoxon rank sum test

<sup>c</sup> Adjusted *P* value by Holm method

AUC, area under the curve; CRS, cytokine release syndrome; GMCSF, granulocyte-macrophage colony-stimulating factor; IFN, interferon; IL, interleukin; ns, not significant; TNF, tumor necrosis factor

\**P*<0.05; \*\**P*<0.01; \*\*\**P*<0.001; \*\*\*\**P*<0.0001

**Supplementary Table 9. Correlation of peak serum level with best percentage change in target lesion SLD**

| Serum protein                                                                                                                                                                                                                                                  | Two-sided Spearman R | P value |      |
|----------------------------------------------------------------------------------------------------------------------------------------------------------------------------------------------------------------------------------------------------------------|----------------------|---------|------|
| IFN-gamma                                                                                                                                                                                                                                                      | -0.626               | 0.00008 | **** |
| ARG1                                                                                                                                                                                                                                                           | 0.556                | 0.00065 | ***  |
| CX3CL1                                                                                                                                                                                                                                                         | -0.482               | 0.00377 | **   |
| IL6                                                                                                                                                                                                                                                            | -0.458               | 0.00616 | **   |
| CXCL10                                                                                                                                                                                                                                                         | -0.456               | 0.00637 | **   |
| CXCL9                                                                                                                                                                                                                                                          | -0.434               | 0.00971 | **   |
| CCL3                                                                                                                                                                                                                                                           | -0.424               | 0.01177 | *    |
| CCL23                                                                                                                                                                                                                                                          | -0.421               | 0.01238 | *    |
| IL10                                                                                                                                                                                                                                                           | -0.394               | 0.02000 | *    |
| MCP-4                                                                                                                                                                                                                                                          | -0.389               | 0.02165 | *    |
| MCP-3                                                                                                                                                                                                                                                          | -0.375               | 0.02721 | *    |
| TNF                                                                                                                                                                                                                                                            | -0.365               | 0.03176 | *    |
| MCP-1                                                                                                                                                                                                                                                          | -0.364               | 0.03204 | *    |
| HO-1                                                                                                                                                                                                                                                           | -0.345               | 0.04311 | *    |
| OLINK Normalized Protein eXpression (NPX) unit measured across all available post-infusion sampling time points with best % change in target lesion SLD<br>* $P < 0.05$ ; ** $P < 0.01$ ; *** $P < 0.001$ ; **** $P < 0.0001$<br>SLD, sum of longest diameters |                      |         |      |

**Supplementary Table 10. Afami-cel dose, vector copy number, tumor MAGE-A4 expression and serum IFN $\gamma$  profiles in ovarian cancer across all dose groups**

|                                                                                                                                                                                               | Transduced Dose | Peak VCN/ $\mu$ g DNA | MAGE-A4 Expression |         | IFN $\gamma$ |             |
|-----------------------------------------------------------------------------------------------------------------------------------------------------------------------------------------------|-----------------|-----------------------|--------------------|---------|--------------|-------------|
|                                                                                                                                                                                               |                 |                       | H Score            | % 2+/3+ | Peak (units) | AUC (units) |
| Dose Group 1                                                                                                                                                                                  | 1.00E+08        | 6307.9                | 15                 | 5       | 33.8         | 465.3       |
|                                                                                                                                                                                               | 1.00E+08        | 24889.1               | 130                | 50      | 139.7        | 1018.6      |
|                                                                                                                                                                                               | 1.00E+08        | 1101.7                | 18                 | 6       | 25           | 292.3       |
| Dose Group 2                                                                                                                                                                                  | 1.20E+09        | 26731.9               | 145                | 60      | 79.8         | 724.5       |
|                                                                                                                                                                                               | 1.20E+09        | 121899.7              | 75                 | 25      | 67.4         | 468.7       |
|                                                                                                                                                                                               | 1.19E+09        | 118069.2              | 165                | 55      | 293.1        | 2465.8      |
| Group 3/Expansion                                                                                                                                                                             | 5.68E-09        | 129581.3              | 18                 | 6       | 108.6        | 502.7       |
|                                                                                                                                                                                               | 9.43E+09        | 315990.1              | 220                | 70      | 121.3        | 662.6       |
|                                                                                                                                                                                               | 7.85E+09        | 312971.3              | 55                 | 10      | 82.7         | NE          |
| AUC, area under the curve (Day 0-Day 21); IFN, interferon; MAGE-A4, melanoma-associated antigen A4; NE, non-evaluable as sampling timepoints only available to Day 8; VCN, vector copy number |                 |                       |                    |         |              |             |

**Supplementary Table 11. Laboratory values to define adequate organ function**

| System                                                                                                                                                                                                                                                                                                                                                                                                                                                                                                                                          | Laboratory value                                                                                |
|-------------------------------------------------------------------------------------------------------------------------------------------------------------------------------------------------------------------------------------------------------------------------------------------------------------------------------------------------------------------------------------------------------------------------------------------------------------------------------------------------------------------------------------------------|-------------------------------------------------------------------------------------------------|
| <b>Hematological</b>                                                                                                                                                                                                                                                                                                                                                                                                                                                                                                                            |                                                                                                 |
| Absolute neutrophil count                                                                                                                                                                                                                                                                                                                                                                                                                                                                                                                       | $\geq 1.5 \times 10^9/\text{L}$ (without granulocyte colony-stimulating factor support)         |
| Platelets                                                                                                                                                                                                                                                                                                                                                                                                                                                                                                                                       | $\geq 100 \times 10^9/\text{L}$                                                                 |
| Hemoglobin                                                                                                                                                                                                                                                                                                                                                                                                                                                                                                                                      | $> 80 \text{ g/L}$ (without transfusion support within 7 days prior to leukapheresis)           |
| <b>Coagulation</b>                                                                                                                                                                                                                                                                                                                                                                                                                                                                                                                              |                                                                                                 |
| Prothrombin time or international normalized ratio                                                                                                                                                                                                                                                                                                                                                                                                                                                                                              | $\leq 1.5 \times \text{ULN}$ unless receiving therapeutic anticoagulation                       |
| Partial thromboplastin time                                                                                                                                                                                                                                                                                                                                                                                                                                                                                                                     | $\leq 1.5 \times \text{ULN}$ unless receiving therapeutic anticoagulation                       |
| <b>Renal</b>                                                                                                                                                                                                                                                                                                                                                                                                                                                                                                                                    |                                                                                                 |
| Calculated or measured creatinine clearance <sup>a</sup>                                                                                                                                                                                                                                                                                                                                                                                                                                                                                        | $\geq 60 \text{ ml/min}$<br>Exception: patients with urothelial cancer $\geq 40 \text{ ml/min}$ |
| <b>Hepatic</b>                                                                                                                                                                                                                                                                                                                                                                                                                                                                                                                                  |                                                                                                 |
| Serum total bilirubin                                                                                                                                                                                                                                                                                                                                                                                                                                                                                                                           | $\leq 1.5 \times \text{ULN}$ (unless patient had documented Gilbert's syndrome)                 |
| Alanine aminotransferase/serum glutamic pyruvic transaminase                                                                                                                                                                                                                                                                                                                                                                                                                                                                                    | $\leq 2.5 \times \text{ULN}$                                                                    |
| Renal function was reassessed at baseline<br><sup>a</sup> Creatinine clearance was calculated using the Cockcroft-Gault Method:<br>$\text{Creatinine clearance} = \frac{(140 - \text{age}) \times \text{weight kg}}{72 \times \text{serum creatinine mg/dl}} (\times 0.85 \text{ in females})$ <u>or</u> by 24-hour urine creatinine collection <u>or</u> by nuclear medicine ethylenediamine tetraacetic acid glomerular filtration rate measurement, according to standard practice at the treating institution<br>ULN, upper limit of normal |                                                                                                 |

**Supplementary Table 12. Prohibited therapy/treatment prior to leukapheresis or lymphodepleting chemotherapy**

| <b>Treatment/therapy</b>                                                                                                                                                                                                                                                                                                                                 | <b>Required washout prior to leukapheresis</b>                                 | <b>Required washout prior to lymphodepletion</b>                                                                                                                    |
|----------------------------------------------------------------------------------------------------------------------------------------------------------------------------------------------------------------------------------------------------------------------------------------------------------------------------------------------------------|--------------------------------------------------------------------------------|---------------------------------------------------------------------------------------------------------------------------------------------------------------------|
| Cytotoxic chemotherapy                                                                                                                                                                                                                                                                                                                                   | 3 weeks                                                                        | 3 weeks                                                                                                                                                             |
| Small molecules/tyrosine kinase inhibitor such as dabrafenib, trametinib, vemurafaneb, and cobimetinib. Note: no washout period was required for compounds that do not cause bone marrow suppression/lymphopenia or for EGFR and ALK/ROS-1 inhibitors unless the multi-kinase inhibitor targets VEGFR (for example, afatinib), PDGFR, or c-Kit receptors | 1 week                                                                         | 1 week                                                                                                                                                              |
| Immune therapy (including monoclonal antibody therapy, checkpoint inhibitors, and biologics)                                                                                                                                                                                                                                                             | 2 weeks                                                                        | 2 weeks                                                                                                                                                             |
| Experimental anticancer vaccine                                                                                                                                                                                                                                                                                                                          | N/A                                                                            | 2 months in the absence of tumor response<br>The patient should have been excluded if their disease was responding to an experimental vaccine given within 6 months |
| Gene therapy using an integrating vector                                                                                                                                                                                                                                                                                                                 | Any use of previous gene therapy using an integrating vector was not permitted | Any use of previous gene therapy using an integrating vector was not permitted                                                                                      |
| Corticosteroids or any other immunosuppressive therapy. Note: use of topical steroids and inhaled steroids was not an exclusion                                                                                                                                                                                                                          | 2 weeks                                                                        | 2 weeks                                                                                                                                                             |
| Investigational treatment                                                                                                                                                                                                                                                                                                                                | 2 weeks or five half-lives, whichever was shorter                              | 2 weeks or five half-lives, whichever was shorter                                                                                                                   |
| Radiotherapy that involved the lung (V20 exceeding 30% lung volume) or pericardium (>20 Gy). Note: exception for a lesser dose or radiation exposure to lung/mediastinum than stated, administered within 4 weeks prior to                                                                                                                               | N/A                                                                            | 3 months                                                                                                                                                            |

| <b>Treatment/therapy</b>                                                                                                                                                                                                                                                                                                                                      | <b>Required washout prior to leukapheresis</b> | <b>Required washout prior to lymphodepletion</b>                                                                                                                                                                     |
|---------------------------------------------------------------------------------------------------------------------------------------------------------------------------------------------------------------------------------------------------------------------------------------------------------------------------------------------------------------|------------------------------------------------|----------------------------------------------------------------------------------------------------------------------------------------------------------------------------------------------------------------------|
| lymphodepletion. Electron beam radiotherapy to superficial structures in the chest was permitted                                                                                                                                                                                                                                                              |                                                |                                                                                                                                                                                                                      |
| Radiation to vital organs (for example, liver and kidney)                                                                                                                                                                                                                                                                                                     | N/A                                            | 4 weeks                                                                                                                                                                                                              |
| Radiation to the pelvis                                                                                                                                                                                                                                                                                                                                       | 4 weeks                                        | 4 weeks                                                                                                                                                                                                              |
| Whole brain radiotherapy or brain stereotactic radiosurgery                                                                                                                                                                                                                                                                                                   | N/A                                            | 2 weeks                                                                                                                                                                                                              |
| Radiotherapy to the target lesions                                                                                                                                                                                                                                                                                                                            | N/A                                            | 3 months prior to lymphodepleting chemotherapy<br>A lesion with unequivocal progression may have been considered a target lesion.<br>Note: there was no washout period for palliative radiation to non-target organs |
| Note: duration of any other anticancer therapies must have been discussed with the sponsor study physician<br>ALK/ROS1, anaplastic lymphoma kinase/proto-oncogene tyrosine-protein kinase; EGFR, estimated glomerular filtration rate; N/A, not applicable; PDGFR, platelet-derived growth factor receptor; VEGFR, vascular endothelial growth actor receptor |                                                |                                                                                                                                                                                                                      |

**Supplementary Table 13. List of institutional review boards and ethics committees**

| <b>Site</b>                                         | <b>Investigator</b>         | <b>Institutional review board or ethics committee</b>                                                                                                  | <b>Chairperson</b>        |
|-----------------------------------------------------|-----------------------------|--------------------------------------------------------------------------------------------------------------------------------------------------------|---------------------------|
| Duke University Medical Center                      | Jeffrey Clarke, MD          | Duke University Health System Institutional Review Board<br>2424 Erwin Road<br>Duke University Medical Center, Suite 405, Box 2712<br>Durham, NC 27705 | Jody Power                |
| The University of Texas MD Anderson Cancer Center   | David S. Hong, MD           | The University of Texas MD Anderson Cancer Center<br>Institutional Review Board<br>7007 Bertner Avenue, Unit 1637<br>Houston, TX 77030                 | Dr. Jennifer Litton, M.D. |
| H. Lee Moffitt Cancer Center and Research Institute | Mihaela Druta, MD           | Advarra IRB<br>6940 Columbia Gateway Drive Suite 110<br>Columbia MD 21046                                                                              | Advarra: Tony Davis       |
| Sylvester Comprehensive Cancer Center               | Brian Matthew Slomovitz, MD | University of Miami Institutional Review Board<br>1400 NW 10 <sup>th</sup> Avenue, Suite 1200A<br>Miami, FL 33136                                      | Daniel H. Kett            |
| Washington University School of Medicine            | Brian Van Tine, MD          | Western Institutional Review Board (WIRB)<br><br>1019 39th Avenue SE Suite 120<br>Puyallup, WA 98374                                                   | Donald D. Deieso          |
| Princess Margaret Cancer Center                     | Dr. Marcus Butler           | University Health Network Research Ethics Board<br>700 University Avenue Hydro Building, 10th Floor Suite 1056<br>Toronto, Ontario M5D 1Z5             | Dr. David Hogg            |

| <b>Site</b>                                         | <b>Investigator</b>      | <b>Institutional review board or ethics committee</b>                                                                                                                           | <b>Chairperson</b>     |
|-----------------------------------------------------|--------------------------|---------------------------------------------------------------------------------------------------------------------------------------------------------------------------------|------------------------|
| James Cancer Hospital and Solove Research Institute | David A. Liebner, MD     | The Ohio State University<br>Cancer Institutional Review Board Office of Responsible Research Practices<br>1960 Kenny Road<br>300 OSU Research Foundation<br>Columbus, OH 43210 | William Carson III, MD |
| The Sarah Cannon Research Institute                 | Melissa L. Johnson, MD   | Western Institutional Review Board<br>1019 39th Avenue SE Suite 120<br>Puyallup, WA 98374                                                                                       | Donald D. Deieso       |
| Fox Chase Cancer Center                             | Anthony Olszanski, MD    | WIRB<br>1019 39th Avenue SE Suite 120<br>Puyallup, WA 98374                                                                                                                     | Donald D. Deieso       |
| Roswell Park Cancer Institute                       | Adekunle Odunsi, MD, PhD | Roswell Park Institute<br>Institutional Review Board<br>Elm & Carlton Streets<br>Buffalo, New York 14263                                                                        | Donald Handley         |

**Supplementary Table 14. Fludarabine and cyclophosphamide treatment schema: all dose groups**

| <b>Dose Group</b>    | <b>Afami-cel Dose Range</b> | <b>Lymphodepletion Regimen</b>                                                                                                               |
|----------------------|-----------------------------|----------------------------------------------------------------------------------------------------------------------------------------------|
| Dose Group 1         | 0.08-0.12×10 <sup>9</sup>   | Cyclophosphamide (600 mg/m <sup>2</sup> /day) plus fludarabine (30 mg/m <sup>2</sup> /day) on Days -7, -6, and -5                            |
| Dose Group 2         | 0.5-1.2×10 <sup>9</sup>     | Cyclophosphamide (600 mg/m <sup>2</sup> /day) plus fludarabine (30 mg/m <sup>2</sup> /day) on Days -7, -6, and -5                            |
| Dose Group 3         | 1.2-6×10 <sup>9</sup>       | Cyclophosphamide (600 mg/m <sup>2</sup> /day) on Days -7, -6, and -5 plus fludarabine (30 mg/m <sup>2</sup> /day) on Days -7, -6, -5, and -4 |
| Dose Expansion Group | 1.2-10×10 <sup>9</sup>      | Cyclophosphamide (1800 mg/m <sup>2</sup> /day) on Days -3 and -2 plus fludarabine (30 mg/m <sup>2</sup> /day) on Days -5, -4, -3, and -2     |
|                      |                             | Cyclophosphamide (600 mg/m <sup>2</sup> /day) on Days -7, -6, and -5 plus fludarabine (30 mg/m <sup>2</sup> /day) Days -7, -6, -5, and -4    |

**Supplementary Table 15. Antibody dilutions**

| <b>Reagent</b>                                                                                                              | <b>Clone</b> | <b>Supplier</b>   | <b>Titer (μl)</b> | <b>Dilution</b> |
|-----------------------------------------------------------------------------------------------------------------------------|--------------|-------------------|-------------------|-----------------|
| Live/Dead Aqua                                                                                                              |              | Fisher Scientific | 0.25              | 200             |
| CD3 BUV395                                                                                                                  | SK7          | BD Biosciences    | 0.50              | 100             |
| CD4 BUV496                                                                                                                  | SK3          | BD Biosciences    | 0.50              | 100             |
| CD8 BUV737                                                                                                                  | SK1          | BD Biosciences    | 1.00              | 50              |
| CD45RA APC-Cy7                                                                                                              | HI100        | Biolegend         | 0.25              | 200             |
| CD197 (CCR7) PE-Cy7                                                                                                         | G043H7       | Biolegend         | 1.00              | 50              |
| Dextramer PE : MAGE A-4                                                                                                     |              | Immudex           | 10.0              | 5               |
| The titer column shows volume used in 50 μl total staining volume, and the dilution column shows calculated dilution factor |              |                   |                   |                 |
